# Supplementary material for: Co/N-Doped hierarchical porous carbon as an efficient oxygen electrocatalyst for rechargeable Zn–air battery
Source: Royal Society of Chemistry journal article supplement (doi:10.1039/d1ra01639c), 2021-01-01
Supplement: d1ra01639c1.pdf [file d1ra01639c1.pdf]

**1 Co/N-doped hierarchical porous carbon as efficient oxygen electrocatalysis**  
**2 for rechargeable Zn-air battery**

3 Wenshu Zhou <sup>a</sup>, Yanyan Liu <sup>a</sup>, Huan Liu <sup>c</sup>, Dichao Wu <sup>a</sup>, Gaoyue Zhang <sup>a</sup>, Jianchun Jiang<sup>a, b, \*</sup>

4 <sup>a</sup> Institute of Chemical Industry of Forest Products, Chinese Academy of Forestry (CAF), National  
5 Engineering Lab. for Biomass Chemical Utilization, Key and Open Lab. of Forest Chemical  
6 Engineering, SFA, Nanjing, Jiangsu Province, 210042, China.

7 <sup>b</sup> Co-Innovation Center of Efficient Processing and Utilization of Forest Resources, Nanjing Forestry  
8 University, Nanjing, China.

9 <sup>c</sup> College of Chemistry and Molecular Engineering, Zhengzhou University, Zhengzhou, China

10 \* Corresponding Author. E-mail: jiangjc@icifp.cn (J.C. Jiang)

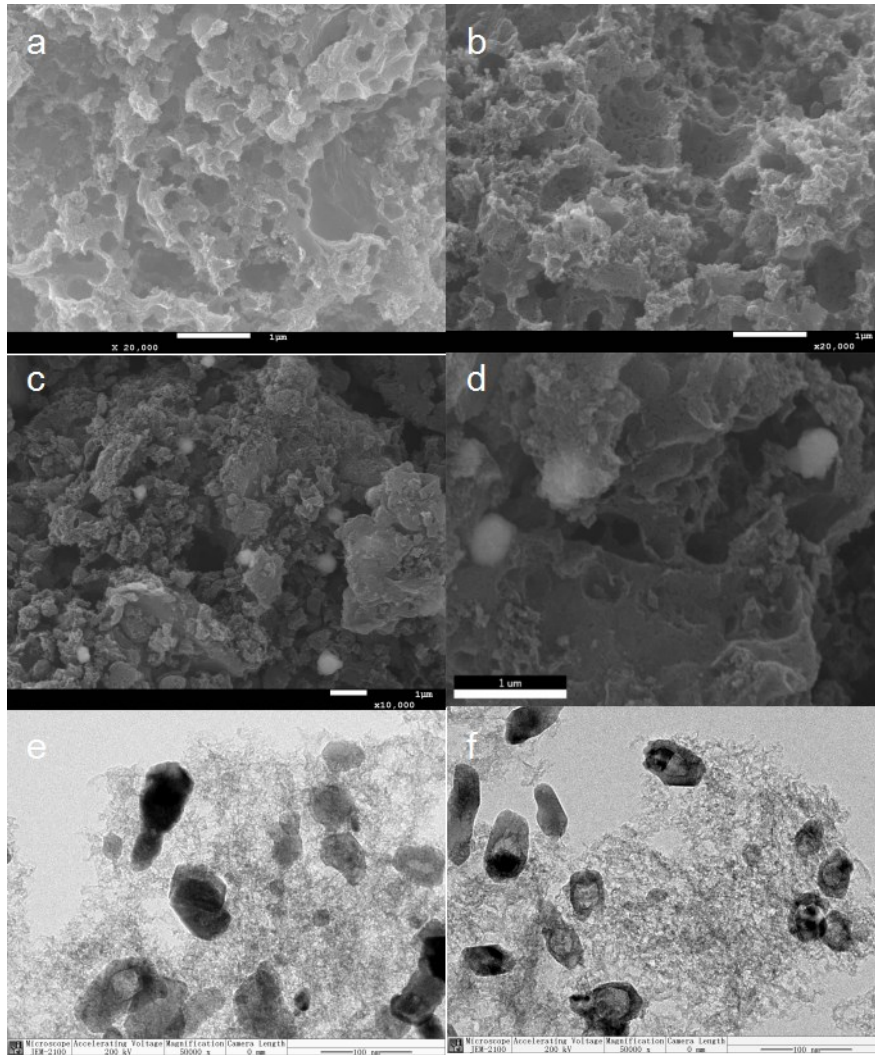

11

12 **Figure S1.** (a-d) SEM images of HPC, NHPC, Co/NHPC-700 and Co/NHPC-900, (e-f) TEM images of

13

Co/NHPC-700 and Co/NHPC-900.

14

15

16

17

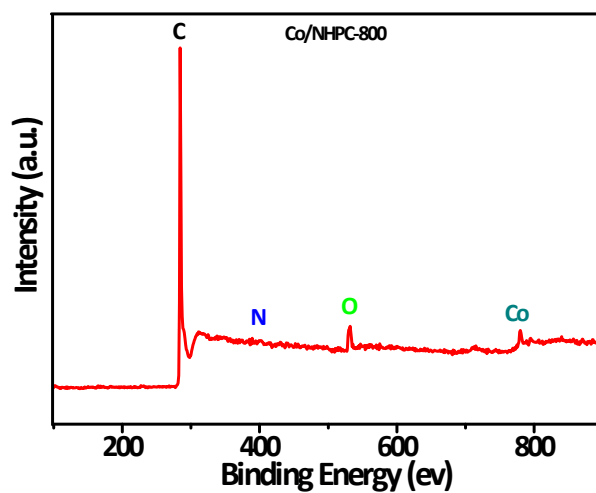

18

19

**Figure S2.** Survey spectrum of Co/NHPC-800

20

**Table S1.** The *t*-Plot report of HPC, NHPC, Co/NHPC-700, Co/NHPC-800 and Co/NHPC-900.

| <i>t</i> -Plot report | $S_{\text{micro}}$               | $S_{\text{external}}$ | $V_{\text{micro}}$                | $V_{\text{total}}$ |
|-----------------------|----------------------------------|-----------------------|-----------------------------------|--------------------|
|                       | $\text{m}^2 \cdot \text{g}^{-1}$ |                       | $\text{cm}^3 \cdot \text{g}^{-1}$ |                    |
| HPC                   | 259                              | 628                   | 0.13                              | 0.59               |
| NHPC                  | 349                              | 622                   | 0.17                              | 0.43               |
| Co/NHPC-700           | 341                              | 646                   | 0.16                              | 0.50               |
| Co/NHPC-800           | 367                              | 701                   | 0.18                              | 0.57               |
| Co/NHPC-900           | 355                              | 706                   | 0.17                              | 0.64               |

21

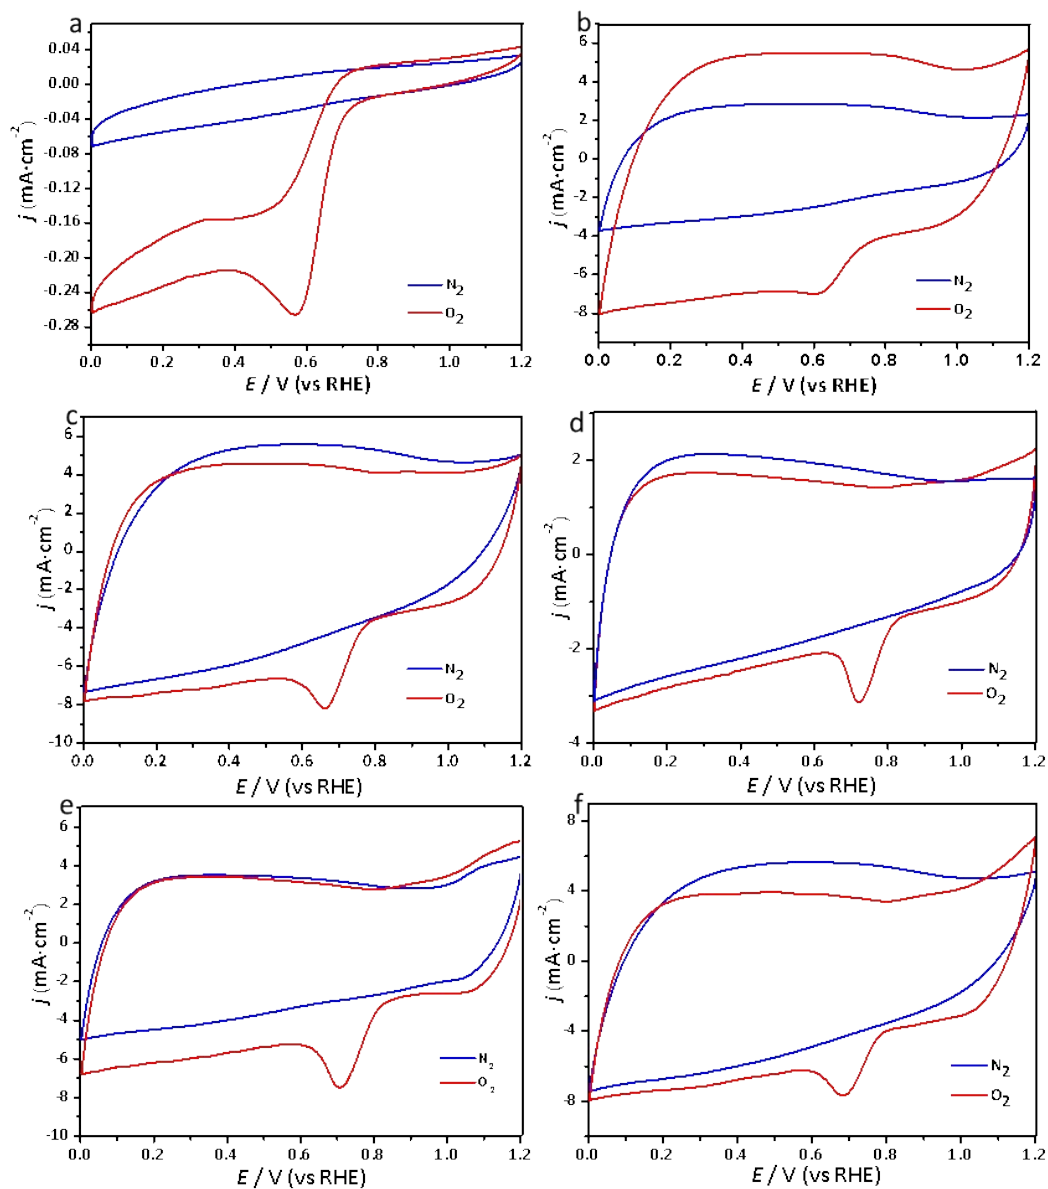

22  
23  
24

**Figure S3.** (a-f) CV curves of WC, HPC, NHPC, Co/NHPC-700, Co/NHPC-800 and Co/NHPC-900, respectively.

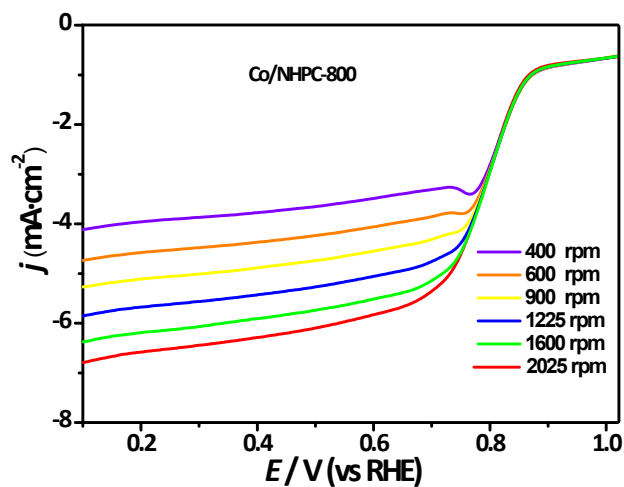

25  
26

**Figure S4.** LSV curves of Co/NHPC-800 with different rotate speed in O<sub>2</sub>-saturated 0.1 M KOH

27 **Table S3** . The comparison of ORR, OER and dual catalytic performances in this work to some  
 28 results from literatures.

| Sample                                                                            | $E_{ORR}$<br><i>onset</i><br>[V] | $E_{ORR1/2}$<br>[V] | Transferre<br>d<br>electrons<br>( <i>n</i> ) | $E_{OER}$ [V]<br>( <i>j</i> =10 mA<br>cm <sup>-2</sup> ) | $\Delta E$<br>( $E_{j=10}$ -<br>$E_{1/2}$ )(V) | RZABs<br>cycle<br>Duration<br>[h] | Ref.                 |
|-----------------------------------------------------------------------------------|----------------------------------|---------------------|----------------------------------------------|----------------------------------------------------------|------------------------------------------------|-----------------------------------|----------------------|
| Co, N-doped CNTs                                                                  | 0.89                             | 0.79                | ~4                                           | 1.61                                                     | 0.82                                           | 12                                | S1                   |
| Co@Co <sub>3</sub> O <sub>4</sub> /NC-1                                           | 0.90                             | 0.80                | 3.78                                         | 1.65                                                     | 0.85                                           | NA                                | S2                   |
| NiCo <sub>2</sub> O <sub>4</sub> @N-<br>graphene                                  | 0.87                             | 0.75                | 3.9                                          | 1.63                                                     | 0.88                                           | 13                                | S3                   |
| NMC/Co@CNTs                                                                       | 0.90                             | 0.79                | 3.76-3.98                                    | 1.73                                                     | 0.94                                           | 11                                | S4                   |
| Fe/N-CNT                                                                          | 0.96                             | 0.81                | 3.85-3.90                                    | 1.75                                                     | 0.94                                           | NA                                | S5                   |
| Co/N-C-800                                                                        | 0.88                             | 0.74                | 3.95                                         | 1.60                                                     | 0.86                                           | 76                                | S6                   |
| Co <sub>3</sub> O <sub>4</sub> /N-rGO                                             | 0.92                             | 0.79                | 3.90                                         | 1.72                                                     | 0.93                                           | 25                                | S7                   |
| Co <sub>3</sub> O <sub>4</sub> /Co <sub>2</sub> MnO <sub>4</sub><br>nanocomposite | 0.90                             | 0.68                | 3.51–3.82                                    | 1.77                                                     | 1.09                                           | -                                 | S8                   |
| NiCoMnO <sub>4</sub> /N-rGO                                                       | 0.92                             | 0.72                | 3.92                                         | 1.77                                                     | 1.05                                           | -                                 | S9                   |
| Co/NHPC-800                                                                       | 0.92                             | 0.82                | 3.8-4.0                                      | 1.71                                                     | 0.89                                           | 364                               | <b>This<br/>work</b> |

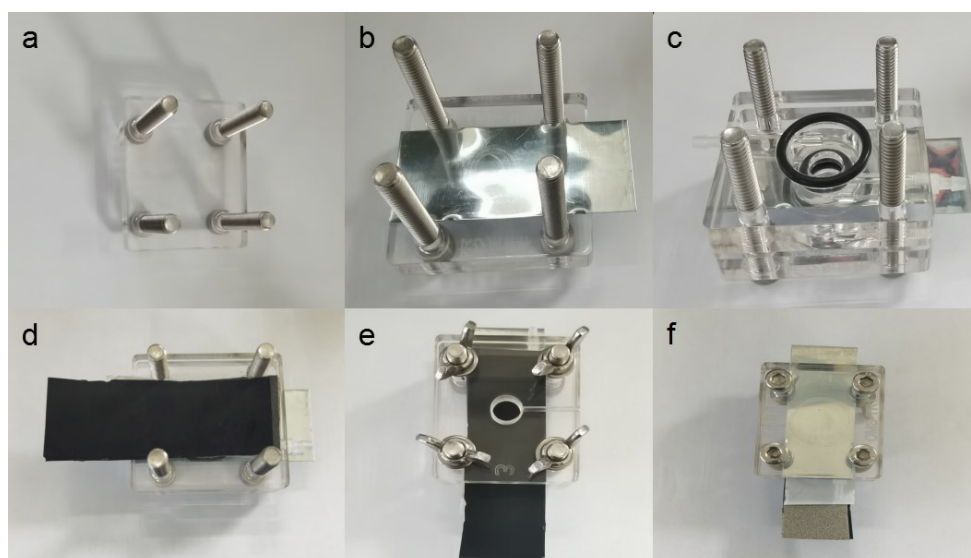

29 **Figure S5.** (a-f) Photographs of the assembly process for the fabrication of a rechargeable  
 30

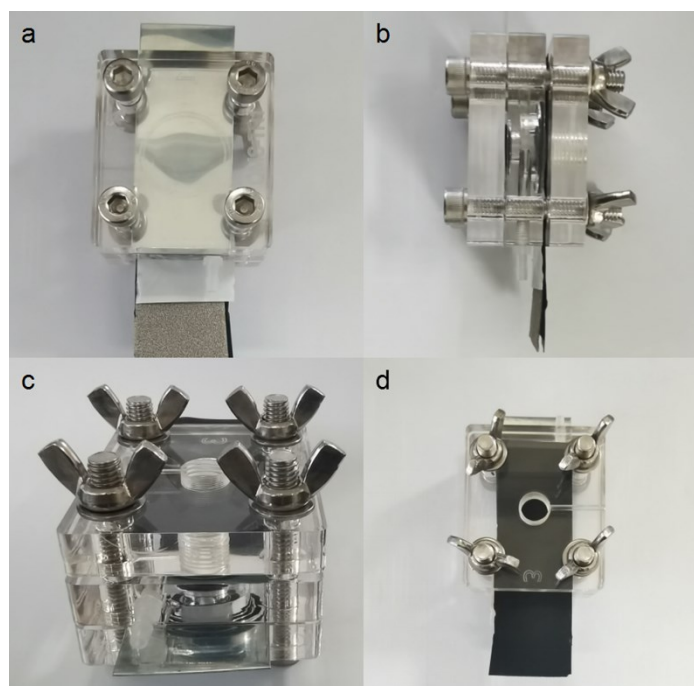

32

33

**Figure S6.** (a-d) Photographs of the rechargeable Zn-air battery recorded from different

34

directions.

### 35 **References.**

36 S1. J. Song, C. Zhua, S. Fu, Y. Song, D. Dua, Y. J. Lin, *Mater. Chem. A*, 2016, **4**, 4864-4870.

37 S2. A. Aijaz, J. Masa, C. Rçsler, W. Xia, P. Weide, A. Botz, R. Fischer, W. Schuhmann, M. Muhler,

38 *Angew. Chem. Int. Edit.*, 2016, **55**, 4087-4091.

39 S3. J. Glatz, L. Chamoreau, A. Flambard, J. Meunier, A. Bouseksoub, R. Lescouëzec, *Chem. Comm.*,

40 2017, **53**, 7836-7839.

41 S4. S. Cai, R. Wang, W. Guo, H. Tang, *Langmuir*, 2018, **34**, 1992-1998.

42 S5. Y. Liu, H. Jiang, Y. Zhu, X. Yang, C. J. Li, *Mater. Chem. A*, 2016, **4**, 1694-1701.

43 S6. Y. Su, Y. Zhu, H. Jiang, J. Shen, X. Yang, W. Zou, J. Chen, C. Li, *Nanoscale*, 2014, **6**, 15080-

44 15089.

45 S7. Y. Li, C. Zhong, J. Liu, X. Zeng, S. Qu, X. Han, Y. Deng, W. Hu, J. Lu, *Adv. Mater.*, 2017, **30**,

46 1703657.

47 S8. D. Wang, X. Chen, D. Evans, W. Yang, *Nanoscale*, 2013, **5**, 5312-5315.

48 S9. A. Pendashteh, J. Palma, M. Anderson, R. Marcilla, *Appl. Catal. B-Environ.*, 2017, **201**, 241-252.

49
